# Supplementary material for: Diffusion–reaction models of genipin incorporation into fibrin networks
Source: Royal Society of Chemistry journal article supplement (doi:10.1039/c4tb02025a), 2015-01-01
Supplement: c4tb02025a1.pdf [file c4tb02025a1.pdf]

## Supporting Information

*for*

### **Diffusion-Reaction Models of Genipin Incorporation into Fibrin Networks**

*Chi Ninh<sup>1\*</sup>, Aimon Iftikhar<sup>2\*</sup>, Madeline Cramer<sup>1,2</sup>, and Christopher J. Bettinger<sup>1,2,3\*</sup>*

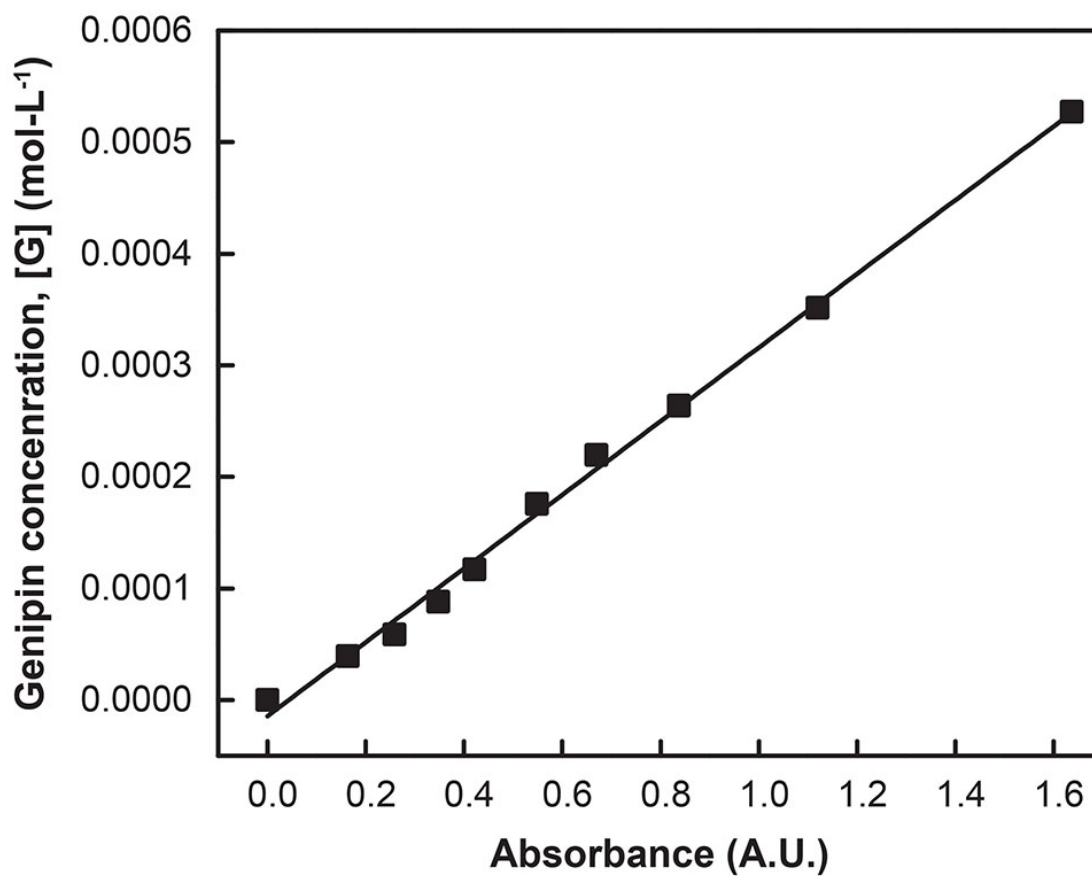

**Figure S1.** Standard curve relating absorbance at  $\lambda_{\text{Abs}} = 240 \text{ nm}$  to the genipin concentration. The fit is used to determine the concentration of genipin at different time points during reaction of genipin with ethylene diamine.

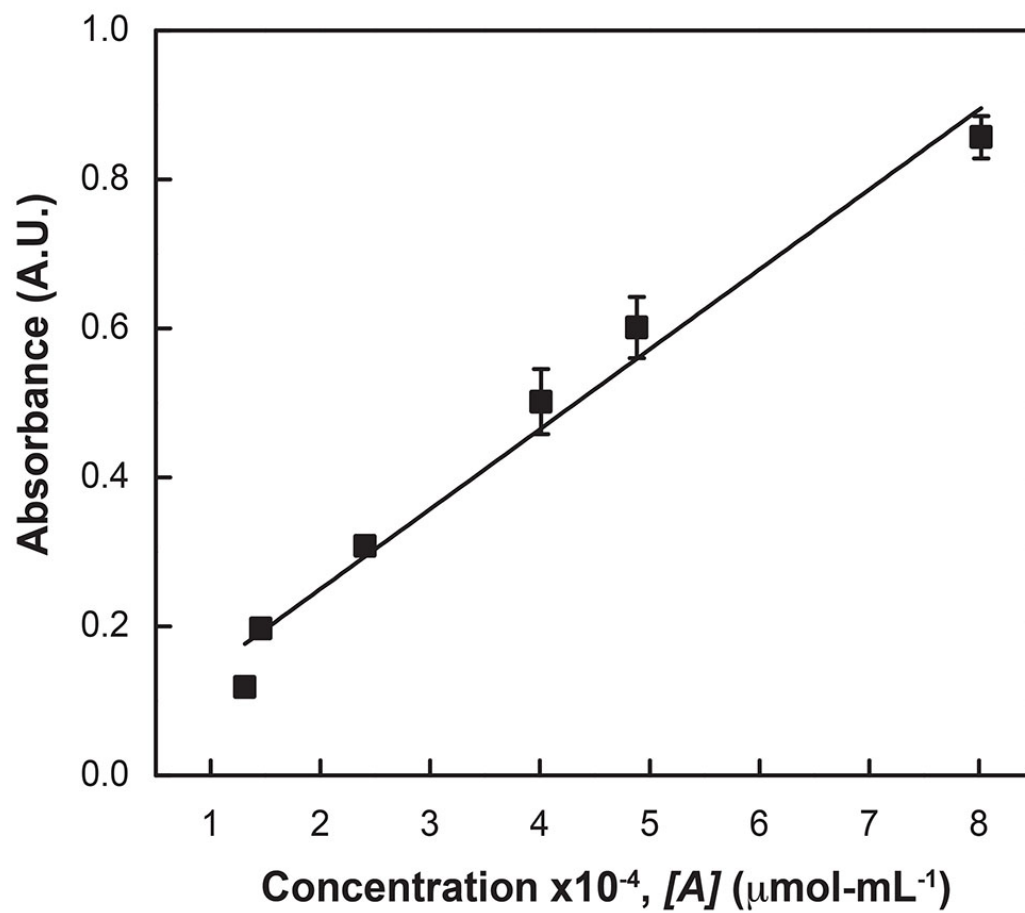

**Figure S2.** Standard curve relating absorbance at  $\lambda_{\text{Abs}} = 570 \text{ nm}$  to concentration of primary amine groups using tyramine.

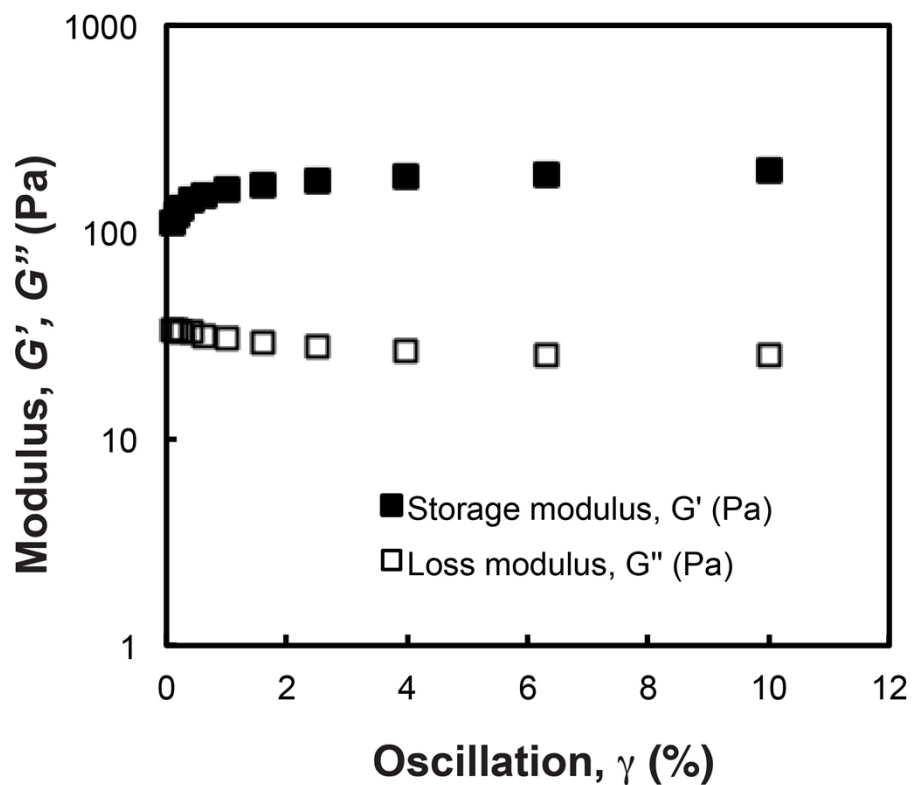

**Figure S3.** Amplitude sweep of fibrin gels from  $\gamma = 0.1\%$  to  $10\%$ . Frequency sweeps were conducted from  $\omega = 0.1\text{--}10 \text{ rad}\cdot\text{s}^{-1}$  using a strain amplitude of  $\gamma = 2\%$  for subsequent characterization to ensure viscoelastic region (See Text).

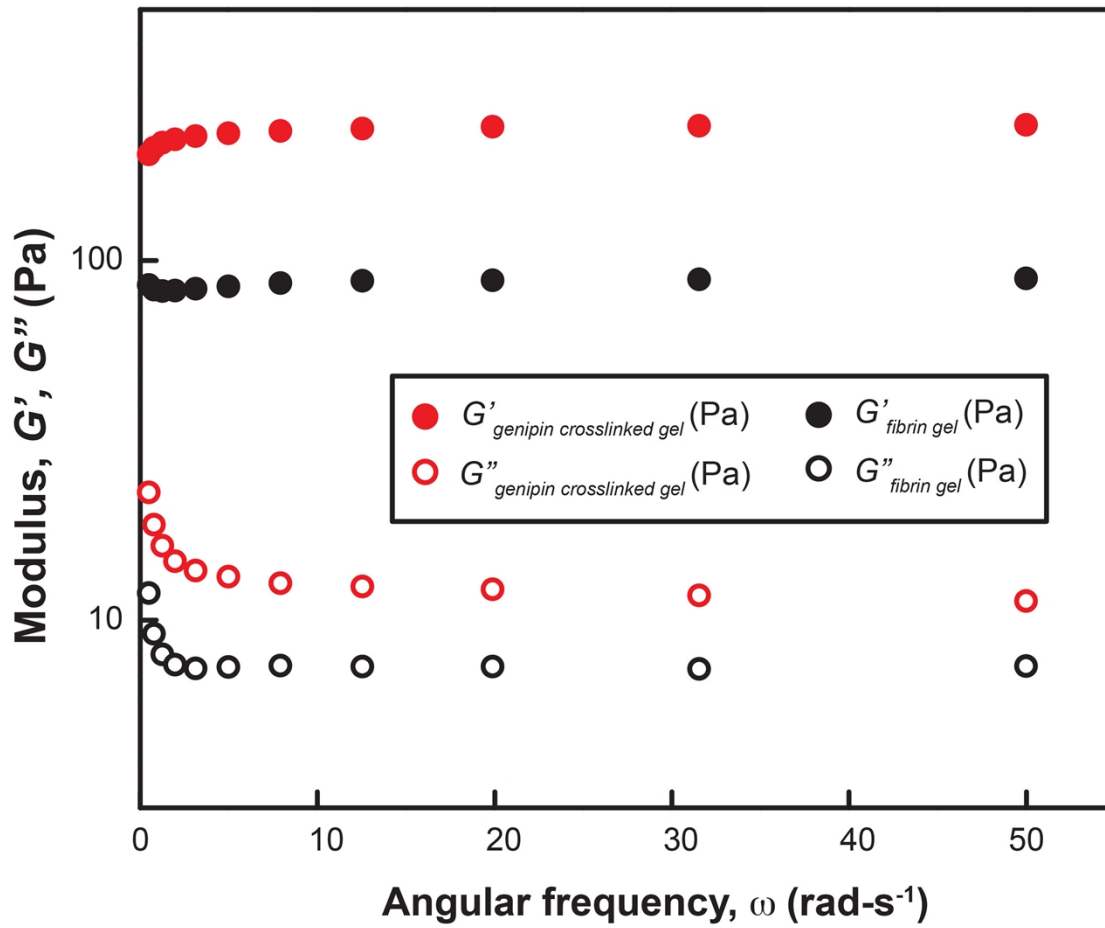

**Figure S4.** Frequency sweep of fibrin hydrogel and fibrin hydrogel incubated in genipin solution for 24 hours at 37 °C using a strain amplitude of  $\gamma = 2\%$ .

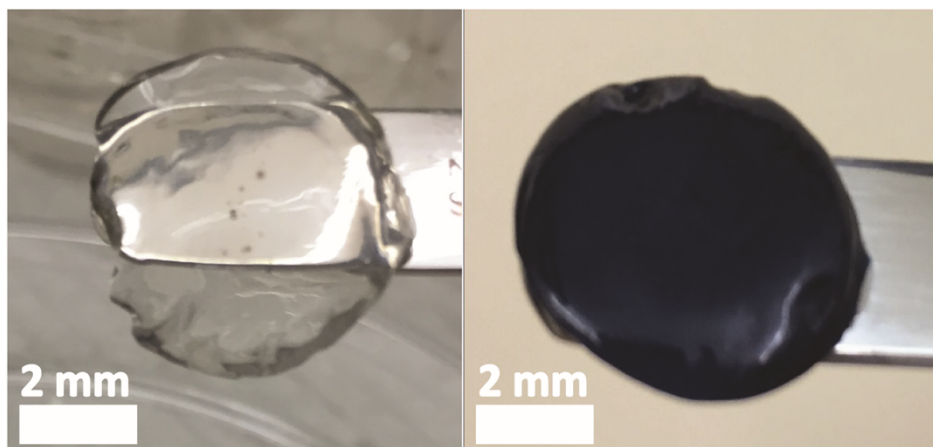

**Figure S5.** Macroscale images of the pristine fibrin gel (left) and genipin-crosslinked fibrin gel (right).

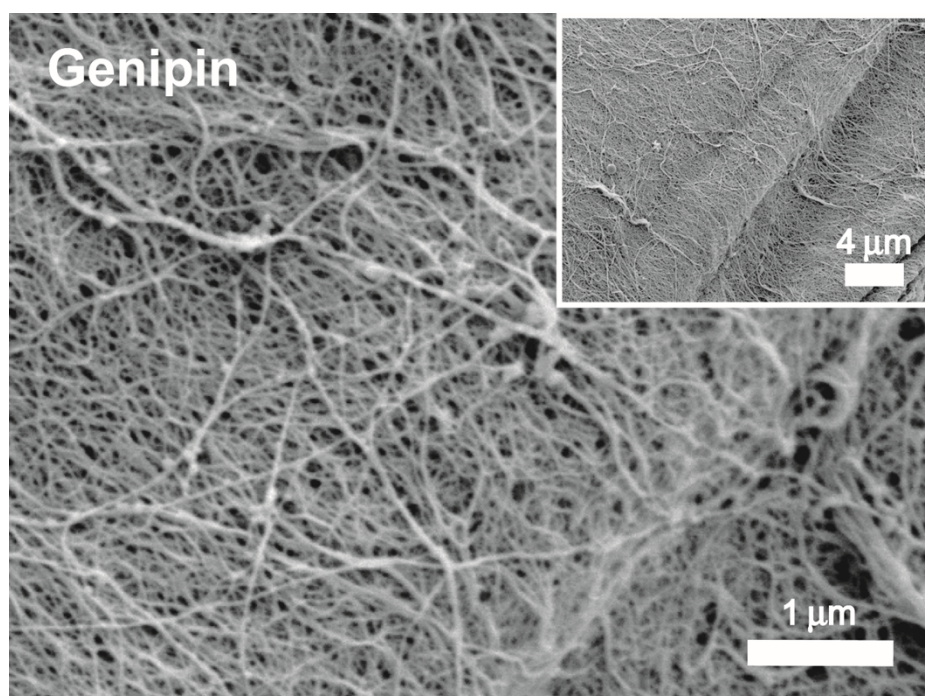

**Figure S6.** Scanning electron micrograph depicting morphology of genipin-crosslinked fibrin gel.

## Detailed Analysis for Time Evolution of Genipin Concentrations (Figure 10)

Predicted time profile of genipin concentration within hypothetical fibrin networks ( $[G]_{fibrin}$ ) is illustrated in Figure 10 for different genipin:PLGA loadings ( $m_{genipin-PLGA,t_0}$ ) using previously determined kinetics data. The hypothetical fibrin network was taken as a cylindrical reactor with radius of 7.95 mm and height of 1 mm. Eqn. 5 was used to interpolate the total mass of genipin released into fibrin network at each time point with step time  $\Delta t = 1$  hr. The concentration of genipin supplied to fibrin networks from the PLGA network ( $\text{mol}\cdot\text{mm}^{-3}$ ) ( $[G]_{PLGA}$ ) was determined knowing the molecular weight of genipin ( $226.2 \text{ mg}\cdot\text{mol}^{-1}$ ), and the volume of the fibrin reaction (calculated as  $198.45 \text{ mm}^3$ ).

The concentration of genipin within fibrin networks ( $[G]_{fibrin}$ ) at  $t = n + 1$  ( $n$  is an integer from 0 to 400 hr) is a function of the concentration of genipin supplied from PLGA networks and the concentration of genipin consumed by reaction with amines within fibrin networks, i.e.

$$[G]_{fibrin,t=n+1} = [G]_{PLGA,t=n+1} + ([G]_{PLGA,t=n} - [G]_{rxn,t=n})$$

The concentration of genipin consumed was predicted from the reaction kinetics (Eqn. 7) in  $\text{mol}\cdot\text{mm}^{-3}\cdot\text{h}^{-1}$

$$-\frac{d[G]}{dt} = 1.116[G]^2[A]^{1.4}$$

Integration of Eqn. 7 gives the relationship to determine  $[G]_{rxn,t=n}$  as

$$[G]_{rxn,t=n} = \frac{[G]_{t=n-1}}{1 + 1.116\Delta t[A]_{t=n-1}^{1.4}}$$

$[G]_{t=0}$  was set as  $0 \text{ mol-mm}^{-3}$  and  $[A]_{t=0}$  was measured using the ninhydrin assay as  $1.99 \text{ mol-mm}^{-3}$  (See Text). The concentration of amines  $[A]_{t=n}$  was predicted by assuming that every mole of reacted genipin consumes one mole of amines via the following relationship:

$$[A]_{t=n} = [A]_{t=n-1} - [G]_{rxn,t=n-1}$$
